# Supplementary material for: Revealing Internal Rotation and 14N Nuclear Quadrupole Coupling in the Atmospheric Pollutant 4-Methyl-2-nitrophenol: Interplay of Microwave Spectroscopy and Quantum Chemical Calculations
Source: MDPI journal article supplement (doi:10.3390/molecules28052153), 2023-02-24
Supplement: s1 [file s1]

# Supplementary Materials

## **Revealing internal rotation and $^{14}\text{N}$ nuclear quadrupole coupling in the atmospheric pollutant 4-methyl-2-nitrophenol: interplay of microwave spectroscopy and quantum chemical calculations**

Shefali Baweja<sup>1,†</sup>, Eleonore Antonelli<sup>2,†</sup>, Safia Hussain<sup>1</sup>, Antonio Fernández-Ramos<sup>3</sup>, Isabelle Kleiner<sup>4</sup>, Ha Vinh Lam Nguyen<sup>2,5,\*</sup>, M. Eugenia Sanz<sup>1,\*</sup>

<sup>1</sup> Department of Chemistry, King's College London, Britannia House, 7 Trinity Street, London SE1 1DB, UK

<sup>2</sup> Univ Paris Est Créteil and Université Paris Cité, CNRS, LISA, F-94010 Créteil, France

<sup>3</sup> Departamento de Química Física and Centro Singular de Investigación en Química Biolóxica e Materiais Moleculares (CIQUS), Jenaro de la Fuente s/n, Universidad de Santiago de Compostela, 15782 Santiago de Compostela, Spain

<sup>4</sup> Université Paris Cité and Univ Paris Est Créteil, CNRS, LISA, F-75013 Paris, France

<sup>5</sup> Institut Universitaire de France (IUF), 1 rue Descartes, F-75231 Paris Cedex 05, France

<sup>†</sup> These authors contributed equally.

**Table S1.** Nuclear coordinates in the inertial principal axis system for conformer 4MNP-1 calculated using the MP2, B3LYP-D3BJ and B3PW91 methods with the 6-311++G(d,p) basis set. The atom numbers correspond to Figure 1.

|            | MP2          |              |              | B3LYP-D3BJ   |              |              | B3PW91       |              |              |
|------------|--------------|--------------|--------------|--------------|--------------|--------------|--------------|--------------|--------------|
|            | <i>a</i> / Å | <i>b</i> / Å | <i>c</i> / Å | <i>a</i> / Å | <i>b</i> / Å | <i>c</i> / Å | <i>a</i> / Å | <i>b</i> / Å | <i>c</i> / Å |
| <b>C1</b>  | 0.300712     | 1.231849     | −0.026556    | 0.298163     | 1.230874     | 0.000002     | 0.302240     | 1.229639     | 0.000002     |
| <b>C2</b>  | 0.381686     | −0.174675    | 0.038264     | 0.382630     | −0.177752    | 0.000050     | 0.382488     | −0.178122    | 0.000006     |
| <b>C3</b>  | −0.766623    | −0.981366    | 0.016070     | −0.770294    | −0.977537    | 0.000086     | −0.769920    | −0.974955    | 0.000006     |
| <b>C4</b>  | −2.035602    | −0.407149    | 0.019758     | −2.029266    | −0.408915    | 0.000028     | −2.028288    | −0.406630    | 0.000004     |
| <b>C5</b>  | −2.124004    | 0.998978     | −0.032945    | −2.111135    | 0.998758     | −0.000088    | −2.105697    | 0.999838     | −0.000002    |
| <b>C6</b>  | −0.986917    | 1.797329     | −0.027739    | −0.985977    | 1.797353     | −0.000126    | −0.980463    | 1.796080     | −0.000005    |
| <b>O7</b>  | 1.349566     | 2.077662     | −0.035666    | 1.348043     | 2.058792     | 0.000105     | 1.351759     | 2.049029     | 0.000001     |
| <b>N8</b>  | 1.680139     | −0.844664    | 0.001435     | 1.670324     | −0.842283    | −0.000015    | 1.665805     | −0.842371    | 0.000000     |
| <b>C9</b>  | −3.279737    | −1.258803    | 0.046078     | −3.278570    | −1.251263    | 0.000058     | −3.275339    | −1.245967    | 0.000000     |
| <b>O10</b> | 2.697743     | −0.140663    | 0.140485     | 2.695836     | −0.130642    | 0.000011     | 2.685683     | −0.132570    | 0.000008     |
| <b>O11</b> | 1.714719     | −2.063899    | −0.137112    | 1.714357     | −2.061423    | −0.000108    | 1.709205     | −2.055780    | −0.000012    |
| <b>H12</b> | 2.149477     | 1.521524     | 0.008605     | 2.156146     | 1.501313     | 0.000085     | 2.152525     | 1.479089     | 0.000001     |
| <b>H13</b> | −0.639153    | −2.058722    | 0.039934     | −0.639830    | −2.051025    | 0.000130     | −0.638254    | −2.050239    | 0.000010     |
| <b>H14</b> | −3.039484    | −2.310310    | −0.129992    | −3.037589    | −2.315178    | 0.000676     | −3.036506    | −2.311062    | 0.000020     |
| <b>H15</b> | −3.781521    | −1.182899    | 1.016517     | −3.893104    | −1.044612    | 0.881182     | −3.890672    | −1.040287    | 0.881620     |
| <b>H16</b> | −3.987479    | −0.934995    | −0.722808    | −3.892533    | −1.045529    | −0.881687    | −3.890643    | −1.040315    | −0.881647    |
| <b>H17</b> | −3.103135    | 1.473432     | −0.043698    | −3.088298    | 1.470359     | −0.000203    | −3.082437    | 1.475595     | −0.000002    |
| <b>H18</b> | −1.057834    | 2.880448     | −0.068070    | −1.058297    | 2.877468     | −0.000227    | −1.052648    | 2.877583     | −0.000011    |

**Table S2.** Coefficients of the one-dimensional Fourier expansion for the potential energy curves of 4MNP-1 corresponding to Figure S1 calculated at the MP2/6-311++G(d,p) and B3LYP-D3BJ/6-311++G(d,p) levels of theory. The potential is expanded as  $V(\alpha) = \sum_{i=0}^n a_i f_i$ .

| <b>i</b> | <b>f<sub>i</sub></b> | MP2                            |                                        | B3LYP-D3BJ                     |                                        |
|----------|----------------------|--------------------------------|----------------------------------------|--------------------------------|----------------------------------------|
|          |                      | <b>a<sub>i</sub> / Hartree</b> | <b>a<sub>i</sub> / cm<sup>−1</sup></b> | <b>a<sub>i</sub> / Hartree</b> | <b>a<sub>i</sub> / cm<sup>−1</sup></b> |
| 0        | 1                    | −549.977643082                 |                                        | −551.489572611                 |                                        |
| 1        | cos(3α)              | −0.000197646                   | 43.4                                   | −0.000268241                   | 58.9                                   |
| 2        | cos(6α)              | 0.000047188                    | 10.4                                   | 0.000009863                    | 2.2                                    |
| 3        | sin(3α)              | 0.000032343                    | 7.1                                    | /                              | /                                      |

**Figure S1.** Potential energy curve of 4MNP-1 obtained at the B3LYP-D3BJ/6-311++G(d,p) (black) and MP2/6-311++G(d,p) (blue) levels of theory by varying the dihedral angle  $\alpha = \angle(\text{C3,C4,C9,H14})$ , corresponding to a rotation of the methyl group about the C4-C9 bond.

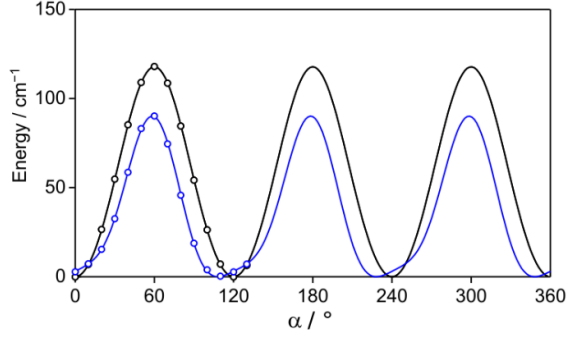

**Table S3.** First eigenvalues (in  $\text{cm}^{-1}$ ) after diagonalization of the one-dimensional ( $E_{1D}$ ) and two-dimensional ( $E_{2D}$ ) potentials of Figure 2. All listed  $E_{2D}$  levels correspond to excitations of the methyl group torsion.

| Level | $E_{1D}$ | $E_{2D}$ | Level | $E_{1D}$ | $E_{2D}$ |
|-------|----------|----------|-------|----------|----------|
| 0     | 33.24    | 304.66   | 10    | 195.51   | 465.21   |
| 1     | 34.05    | 305.55   | 11    | 253.79   | 523.63   |
| 2     | 34.05    | 305.55   | 12    | 254.08   | 523.88   |
| 3     | 89.14    | 358.89   | 13    | 323.72   | 593.62   |
| 4     | 89.14    | 358.89   | 14    | 323.72   | 593.62   |
| 5     | 100.09   | 370.77   | 15    | 404.58   | 674.54   |
| 6     | 123.26   | 392.19   | 16    | 404.58   | 674.54   |
| 7     | 148.99   | 418.51   | 17    | 496.40   | 766.42   |
| 8     | 148.99   | 418.51   | 18    | 496.40   | 766.42   |
| 9     | 195.51   | 465.21   |       |          |          |

The one-dimensional levels were obtained by the diagonalization of the  $V_3$  potential whereas the two-dimensional levels involved the diagonalization of the Schrödinger equation with a potential of the type:

$$V(\phi_1, \phi_2) = a_0 + a_3(\phi_1) + \sum_{k=1}^6 b_k \cos(k\phi_2) + \sum_{k=1}^6 c_{3,k} \cos(3\phi_1) \cos(k\phi_2) + \sum_{k=1}^6 d_{3,k} \sin(3\phi_1) \sin(k\phi_2) \quad (\text{S1})$$

**Table S4.** Coefficients of the Fourier series of equation S1.

|           |         |
|-----------|---------|
| $a_0$     | 3159.0  |
| $a_3$     | 19.19   |
| $b_1$     | 1776.1  |
| $b_2$     | -1197.1 |
| $b_3$     | 120.08  |
| $b_4$     | -20.38  |
| $b_5$     | -8.88   |
| $b_6$     | 1.25    |
| $c_{3,1}$ | -19.44  |
| $c_{3,2}$ | 13.67   |
| $c_{3,3}$ | -3.79   |
| $c_{3,4}$ | 1.75    |
| $c_{3,5}$ | 0.23    |
| $c_{3,6}$ | -2.06   |
| $d_{3,1}$ | 1.36    |
| $d_{3,2}$ | -8.37   |
| $d_{3,3}$ | -0.081  |
| $d_{3,4}$ | -1.32   |
| $d_{3,5}$ | -0.89   |
| $d_{3,6}$ | -1.59   |

**Table S5.** Observed frequencies ( $\nu_{\text{obs}}$ ) of the A and E species of 4MNP-1. The  $\nu_{\text{obs}} - \nu_{\text{calc}}$  residuals are obtained with the *XIAM* and *BELGI- $C_s$ -hyperfine* programs.

| $J$         | $K_a$ | $K_c$ | $F$ | $J$         | $K_a$ | $K_c$ | $F$ | $Species$ | $\nu_{\text{obs}}$<br>/ MHz | $\nu_{\text{obs}} - \nu_{\text{calc}}$<br><i>XIAM</i> / kHz | $\nu_{\text{obs}} - \nu_{\text{calc}}$<br><i>BELGI</i> / kHz |
|-------------|-------|-------|-----|-------------|-------|-------|-----|-----------|-----------------------------|-------------------------------------------------------------|--------------------------------------------------------------|
| Upper level |       |       |     | Lower level |       |       |     |           |                             |                                                             |                                                              |
| 2           | 0     | 2     | 2   | 1           | 0     | 1     | 2   | A         | 3040.9781                   | 1.7                                                         | -1                                                           |
| 2           | 0     | 2     | 1   | 1           | 0     | 1     | 0   | A         | 3041.0739                   | 1.6                                                         | -1                                                           |
| 2           | 0     | 2     | 2   | 1           | 0     | 1     | 1   | A         | 3041.2236                   | 3.0                                                         | 2                                                            |
| 2           | 0     | 2     | 3   | 1           | 0     | 1     | 2   | A         | 3041.2749                   | 1.4                                                         | 0                                                            |
| 2           | 0     | 2     | 2   | 1           | 0     | 1     | 2   | E         | 3027.1453                   | -9.9                                                        | -1                                                           |
| 2           | 0     | 2     | 2   | 1           | 0     | 1     | 1   | E         | 3027.3654                   | -28.2                                                       | 1                                                            |
| 2           | 0     | 2     | 3   | 1           | 0     | 1     | 2   | E         | 3027.4484                   | 1.5                                                         | 1                                                            |
| 2           | 1     | 1     | 2   | 1           | 1     | 0     | 1   | A         | 3418.7926                   | 16.4                                                        | 12                                                           |
| 2           | 1     | 1     | 3   | 1           | 1     | 0     | 2   | A         | 3419.0219                   | 3.0                                                         | 0                                                            |
| 2           | 1     | 1     | 1   | 1           | 1     | 0     | 0   | A         | 3419.4051                   | 0.7                                                         | -1                                                           |
| 2           | 1     | 1     | 2   | 1           | 1     | 0     | 1   | E         | 3316.6403                   | 17.3                                                        | 2                                                            |
| 2           | 1     | 1     | 3   | 1           | 1     | 0     | 2   | E         | 3316.8156                   | 1.8                                                         | 2                                                            |
| 2           | 1     | 1     | 1   | 1           | 1     | 0     | 0   | E         | 3317.0695                   | -22.5                                                       | 0                                                            |
| 2           | 1     | 2     | 2   | 1           | 1     | 1     | 2   | A         | 2796.9410                   | 1.2                                                         | 2                                                            |
| 2           | 1     | 2     | 2   | 1           | 1     | 1     | 1   | A         | 2796.9598                   | -1.4                                                        | -2                                                           |
| 2           | 1     | 2     | 3   | 1           | 1     | 1     | 2   | A         | 2797.2258                   | 1.5                                                         | 2                                                            |
| 2           | 1     | 2     | 1   | 1           | 1     | 1     | 0   | A         | 2797.3462                   | -4.1                                                        | -1                                                           |
| 2           | 1     | 2     | 1   | 1           | 1     | 1     | 1   | A         | 2797.4047                   | 0.9                                                         | 0                                                            |
| 2           | 1     | 2     | 2   | 1           | 1     | 1     | 1   | E         | 2896.5013                   | -21.2                                                       | -2                                                           |
| 2           | 1     | 2     | 3   | 1           | 1     | 1     | 2   | E         | 2896.8367                   | 0.0                                                         | -4                                                           |
| 2           | 1     | 2     | 1   | 1           | 1     | 1     | 1   | E         | 2896.8913                   | -32.8                                                       | -5                                                           |
| 2           | 1     | 2     | 1   | 1           | 1     | 1     | 0   | E         | 2897.1141                   | 49.8                                                        | 5                                                            |
| 3           | 0     | 3     | 3   | 2           | 0     | 2     | 3   | A         | 4412.6220                   | 1.2                                                         | -1                                                           |
| 3           | 0     | 3     | 3   | 2           | 0     | 2     | 2   | A         | 4412.9153                   | -2.5                                                        | -3                                                           |
| 3           | 0     | 3     | 2   | 2           | 0     | 2     | 1   | A         | 4412.9384                   | 3.6                                                         | 2                                                            |
| 3           | 0     | 3     | 4   | 2           | 0     | 2     | 3   | A         | 4412.9756                   | 0.0                                                         | -1                                                           |
| 3           | 0     | 3     | 2   | 2           | 0     | 2     | 2   | A         | 4413.3951                   | -1.8                                                        | -1                                                           |
| 3           | 0     | 3     | 3   | 2           | 0     | 2     | 3   | E         | 4404.1628                   | -6.6                                                        | -1                                                           |
| 3           | 0     | 3     | 3   | 2           | 0     | 2     | 2   | E         | 4404.4676                   | 6.5                                                         | 2                                                            |
| 3           | 0     | 3     | 2   | 2           | 0     | 2     | 1   | E         | 4404.4782                   | -3.0                                                        | 1                                                            |
| 3           | 0     | 3     | 4   | 2           | 0     | 2     | 3   | E         | 4404.5172                   | -3.2                                                        | -3                                                           |
| 3           | 0     | 3     | 2   | 2           | 0     | 2     | 2   | E         | 4404.9464                   | 11.5                                                        | 0                                                            |
| 3           | 1     | 2     | 3   | 2           | 1     | 1     | 2   | A         | 5081.0913                   | 4.6                                                         | 0                                                            |
| 3           | 1     | 2     | 4   | 2           | 1     | 1     | 3   | A         | 5081.1113                   | -56.1                                                       | -2                                                           |
| 3           | 1     | 2     | 2   | 2           | 1     | 1     | 1   | A         | 5081.2045                   | 4.2                                                         | 0                                                            |
| 3           | 1     | 2     | 3   | 2           | 1     | 1     | 2   | E         | 5018.7405                   | 3.7                                                         | 1                                                            |
| 3           | 1     | 2     | 4   | 2           | 1     | 1     | 3   | E         | 5018.8011                   | 2.6                                                         | -1                                                           |
| 3           | 1     | 2     | 2   | 2           | 1     | 1     | 1   | E         | 5018.8331                   | 14.7                                                        | 10                                                           |
| 3           | 1     | 3     | 3   | 2           | 1     | 2     | 3   | A         | 4157.3121                   | -0.4                                                        | 0                                                            |
| 3           | 1     | 3     | 3   | 2           | 1     | 2     | 2   | A         | 4157.5965                   | -0.6                                                        | 0                                                            |
| 3           | 1     | 3     | 4   | 2           | 1     | 2     | 3   | A         | 4157.6860                   | 0.4                                                         | 2                                                            |
| 3           | 1     | 3     | 2   | 2           | 1     | 2     | 2   | A         | 4158.0992                   | -1.5                                                        | 0                                                            |

|   |   |   |   |   |   |   |   |   |           |      |     |
|---|---|---|---|---|---|---|---|---|-----------|------|-----|
| 3 | 1 | 3 | 3 | 2 | 1 | 2 | 3 | E | 4197.9070 | 1.5  | 0   |
| 3 | 1 | 3 | 3 | 2 | 1 | 2 | 2 | E | 4198.1602 | -3.5 | 1   |
| 3 | 1 | 3 | 4 | 2 | 1 | 2 | 3 | E | 4198.2708 | 1.2  | 0   |
| 3 | 1 | 3 | 2 | 2 | 1 | 2 | 2 | E | 4198.6504 | -4.8 | 0   |
| 3 | 2 | 1 | 3 | 2 | 2 | 0 | 2 | A | 4911.1013 | 7.6  | 4   |
| 3 | 2 | 1 | 4 | 2 | 2 | 0 | 3 | A | 4911.3156 | 8.4  | 7   |
| 3 | 2 | 1 | 2 | 2 | 2 | 0 | 1 | A | 4911.4477 | 4.8  | 4   |
| 3 | 2 | 1 | 4 | 2 | 2 | 0 | 2 | E | 4792.2381 | 3.7  | -12 |
| 3 | 2 | 1 | 3 | 2 | 2 | 0 | 2 | E | 4792.2959 | 13.2 | 4   |
| 3 | 2 | 1 | 2 | 2 | 2 | 0 | 1 | E | 4792.6468 | -3.3 | 4   |
| 3 | 2 | 2 | 3 | 2 | 2 | 1 | 2 | A | 4661.9065 | 3.0  | 0   |
| 3 | 2 | 2 | 4 | 2 | 2 | 1 | 3 | A | 4662.1713 | 6.3  | 5   |
| 3 | 2 | 2 | 2 | 2 | 2 | 1 | 1 | A | 4662.3088 | -1.6 | -2  |
| 3 | 2 | 2 | 3 | 2 | 2 | 1 | 2 | E | 4791.2494 | -4.5 | -1  |
| 3 | 2 | 2 | 4 | 2 | 2 | 1 | 3 | E | 4791.5085 | 9.6  | 4   |
| 3 | 2 | 2 | 2 | 2 | 2 | 1 | 1 | E | 4791.6417 | -0.6 | -13 |
| 4 | 0 | 4 | 4 | 3 | 0 | 3 | 4 | A | 5677.0971 | 0.1  | -1  |
| 4 | 0 | 4 | 4 | 3 | 0 | 3 | 3 | A | 5677.4441 | -7.8 | -8  |
| 4 | 0 | 4 | 3 | 3 | 0 | 3 | 2 | A | 5677.4957 | 10.1 | 9   |
| 4 | 0 | 4 | 5 | 3 | 0 | 3 | 4 | A | 5677.5114 | 6.5  | 6   |
| 4 | 0 | 4 | 3 | 3 | 0 | 3 | 3 | A | 5677.9632 | -1.5 | -1  |
| 4 | 0 | 4 | 4 | 3 | 0 | 3 | 4 | E | 5672.1561 | -3.3 | -1  |
| 4 | 0 | 4 | 4 | 3 | 0 | 3 | 3 | E | 5672.5121 | 1.7  | -1  |
| 4 | 0 | 4 | 3 | 3 | 0 | 3 | 2 | E | 5672.5442 | -2.1 | -1  |
| 4 | 0 | 4 | 5 | 3 | 0 | 3 | 4 | E | 5672.5643 | -0.6 | 0   |
| 4 | 0 | 4 | 3 | 3 | 0 | 3 | 3 | E | 5673.0254 | 5.3  | 0   |
| 4 | 1 | 3 | 4 | 3 | 1 | 2 | 3 | A | 6673.8627 | 2.7  | -1  |
| 4 | 1 | 3 | 5 | 3 | 1 | 2 | 4 | A | 6673.9164 | 3.1  | -1  |
| 4 | 1 | 3 | 3 | 3 | 1 | 2 | 2 | A | 6673.9266 | 5.0  | 1   |
| 4 | 1 | 3 | 4 | 3 | 1 | 2 | 3 | E | 6624.8384 | 6.2  | 4   |
| 4 | 1 | 3 | 5 | 3 | 1 | 2 | 4 | E | 6624.8816 | 4.0  | 0   |
| 4 | 1 | 3 | 3 | 3 | 1 | 2 | 2 | E | 6624.8879 | 5.1  | 1   |
| 4 | 1 | 4 | 4 | 3 | 1 | 3 | 4 | A | 5483.4649 | 0.4  | 2   |
| 4 | 1 | 4 | 4 | 3 | 1 | 3 | 3 | A | 5483.8380 | 0.5  | 2   |
| 4 | 1 | 4 | 5 | 3 | 1 | 3 | 4 | A | 5483.8859 | -1.1 | 0   |
| 4 | 1 | 4 | 3 | 3 | 1 | 3 | 3 | A | 5484.3673 | -1.4 | 1   |
| 4 | 1 | 4 | 4 | 3 | 1 | 3 | 4 | E | 5498.2813 | -1.2 | 0   |
| 4 | 1 | 4 | 4 | 3 | 1 | 3 | 3 | E | 5498.6457 | -0.8 | 1   |
| 4 | 1 | 4 | 3 | 3 | 1 | 3 | 2 | E | 5498.6802 | -1.0 | 0   |
| 4 | 1 | 4 | 5 | 3 | 1 | 3 | 4 | E | 5498.6997 | -1.3 | 0   |
| 4 | 1 | 4 | 3 | 3 | 1 | 3 | 3 | E | 5499.1721 | -0.6 | 1   |
| 4 | 2 | 2 | 4 | 3 | 2 | 1 | 3 | A | 6701.1152 | -5.4 | -9  |
| 4 | 2 | 2 | 5 | 3 | 2 | 1 | 4 | A | 6701.2006 | 6.7  | 4   |
| 4 | 2 | 2 | 3 | 3 | 2 | 1 | 2 | A | 6701.2263 | 5.7  | 3   |
| 4 | 2 | 2 | 4 | 3 | 2 | 1 | 3 | E | 6527.4763 | -2.8 | -9  |
| 4 | 2 | 2 | 5 | 3 | 2 | 1 | 4 | E | 6527.5547 | 6.0  | 5   |
| 4 | 2 | 2 | 3 | 3 | 2 | 1 | 2 | E | 6527.5863 | 15.2 | 16  |
| 4 | 2 | 3 | 4 | 3 | 2 | 2 | 3 | A | 6163.4830 | 0.8  | -1  |

|   |   |   |   |   |   |   |   |   |           |       |     |
|---|---|---|---|---|---|---|---|---|-----------|-------|-----|
| 4 | 2 | 3 | 5 | 3 | 2 | 2 | 4 | A | 6163.6044 | 2.3   | 1   |
| 4 | 2 | 3 | 3 | 3 | 2 | 2 | 2 | A | 6163.6332 | 0.2   | 0   |
| 4 | 2 | 3 | 5 | 3 | 2 | 2 | 4 | E | 6346.8323 | 2.7   | -2  |
| 4 | 3 | 1 | 4 | 3 | 3 | 0 | 3 | A | 6380.0359 | 1.9   | -1  |
| 4 | 3 | 1 | 5 | 3 | 3 | 0 | 4 | A | 6380.2628 | 11.3  | 10  |
| 4 | 3 | 1 | 3 | 3 | 3 | 0 | 2 | A | 6380.3368 | -3.4  | -4  |
| 5 | 0 | 5 | 5 | 4 | 0 | 4 | 5 | A | 6893.7557 | -0.2  | -1  |
| 5 | 0 | 5 | 5 | 4 | 0 | 4 | 4 | A | 6894.1645 | 0.7   | 1   |
| 5 | 0 | 5 | 4 | 4 | 0 | 4 | 3 | A | 6894.1894 | -2.4  | -2  |
| 5 | 0 | 5 | 6 | 4 | 0 | 4 | 5 | A | 6894.2049 | -0.2  | 0   |
| 5 | 0 | 5 | 4 | 4 | 0 | 4 | 4 | A | 6894.7019 | -2.7  | -2  |
| 5 | 0 | 5 | 5 | 4 | 0 | 4 | 5 | E | 6890.1574 | -2.6  | -1  |
| 5 | 0 | 5 | 5 | 4 | 0 | 4 | 4 | E | 6890.5655 | 0.0   | -1  |
| 5 | 0 | 5 | 4 | 4 | 0 | 4 | 3 | E | 6890.5898 | -4.8  | -4  |
| 5 | 0 | 5 | 6 | 4 | 0 | 4 | 5 | E | 6890.6064 | -1.3  | -1  |
| 5 | 0 | 5 | 4 | 4 | 0 | 4 | 4 | E | 6891.1060 | 1.6   | -1  |
| 5 | 1 | 4 | 5 | 4 | 1 | 3 | 4 | A | 8158.9412 | 2.5   | -1  |
| 5 | 1 | 4 | 6 | 4 | 1 | 3 | 5 | A | 8158.9911 | 1.6   | -2  |
| 5 | 1 | 4 | 4 | 4 | 1 | 3 | 3 | A | 8158.9959 | 2.0   | -2  |
| 5 | 1 | 4 | 5 | 4 | 1 | 3 | 4 | E | 8123.4494 | 2.0   | 0   |
| 5 | 1 | 4 | 6 | 4 | 1 | 3 | 5 | E | 8123.4961 | 1.9   | -1  |
| 5 | 1 | 4 | 4 | 4 | 1 | 3 | 3 | E | 8123.4961 | -1.4  | -4  |
| 5 | 1 | 5 | 5 | 4 | 1 | 4 | 5 | A | 6778.5709 | -4.2  | -3  |
| 5 | 1 | 5 | 6 | 4 | 1 | 4 | 5 | A | 6779.0149 | -17.0 | -15 |
| 5 | 1 | 5 | 4 | 4 | 1 | 4 | 4 | A | 6779.5413 | -6.2  | -4  |
| 5 | 1 | 5 | 5 | 4 | 1 | 4 | 4 | E | 6784.1612 | -1.6  | 0   |
| 5 | 1 | 5 | 6 | 4 | 1 | 4 | 5 | E | 6784.1973 | -1.6  | 0   |
| 5 | 1 | 5 | 4 | 4 | 1 | 4 | 4 | E | 6784.7101 | 0.0   | 1   |
| 5 | 2 | 3 | 5 | 4 | 2 | 2 | 4 | A | 8489.9893 | 2.9   | 0   |
| 5 | 2 | 3 | 6 | 4 | 2 | 2 | 5 | A | 8490.0247 | 1.8   | -1  |
| 5 | 2 | 3 | 4 | 4 | 2 | 2 | 3 | A | 8490.0346 | 3.7   | 1   |
| 5 | 2 | 3 | 5 | 4 | 2 | 2 | 4 | E | 8346.9344 | 10.6  | 6   |
| 5 | 2 | 3 | 6 | 4 | 2 | 2 | 5 | E | 8346.9490 | 1.8   | -1  |
| 5 | 2 | 3 | 4 | 4 | 2 | 2 | 3 | E | 8346.9490 | -1.8  | -4  |
| 5 | 2 | 4 | 5 | 4 | 2 | 3 | 4 | A | 7622.2239 | -0.3  | 0   |
| 5 | 2 | 4 | 6 | 4 | 2 | 3 | 5 | A | 7622.2969 | 0.7   | 1   |
| 5 | 2 | 4 | 4 | 4 | 2 | 3 | 3 | A | 7622.3108 | 6.3   | 6   |
| 5 | 2 | 4 | 5 | 4 | 2 | 3 | 4 | E | 7755.6592 | -2.1  | -1  |
| 5 | 2 | 4 | 6 | 4 | 2 | 3 | 5 | E | 7755.7498 | 1.4   | -1  |
| 5 | 2 | 4 | 4 | 4 | 2 | 3 | 3 | E | 7755.7674 | 6.1   | 3   |
| 5 | 3 | 2 | 5 | 4 | 3 | 1 | 4 | A | 8094.5379 | 3.0   | 1   |
| 5 | 3 | 2 | 6 | 4 | 3 | 1 | 5 | A | 8094.6333 | 1.2   | 1   |
| 5 | 3 | 2 | 4 | 4 | 3 | 1 | 3 | A | 8094.6527 | -6.4  | -7  |
| 5 | 3 | 2 | 5 | 4 | 3 | 1 | 4 | E | 7993.8461 | 0.3   | -2  |
| 5 | 3 | 2 | 6 | 4 | 3 | 1 | 5 | E | 7993.9530 | 0.2   | 2   |
| 5 | 3 | 2 | 4 | 4 | 3 | 1 | 3 | E | 7993.9714 | -9.9  | -8  |
| 5 | 3 | 3 | 5 | 4 | 3 | 2 | 4 | A | 7920.0503 | 3.2   | 2   |
| 5 | 3 | 3 | 6 | 4 | 3 | 2 | 5 | A | 7920.1670 | 1.3   | 0   |

|   |   |   |   |   |   |   |   |   |            |      |    |
|---|---|---|---|---|---|---|---|---|------------|------|----|
| 5 | 3 | 3 | 4 | 4 | 3 | 2 | 3 | A | 7920.1956  | -0.7 | -1 |
| 5 | 3 | 3 | 5 | 4 | 3 | 2 | 4 | E | 8028.4663  | 6.7  | 5  |
| 5 | 3 | 3 | 6 | 4 | 3 | 2 | 5 | E | 8028.5750  | 7.1  | 2  |
| 5 | 3 | 3 | 4 | 4 | 3 | 2 | 3 | E | 8028.6038  | 6.9  | 1  |
| 5 | 4 | 1 | 5 | 4 | 4 | 0 | 4 | A | 7926.1737  | 4.4  | 1  |
| 5 | 4 | 1 | 6 | 4 | 4 | 0 | 5 | A | 7926.3785  | 5.3  | 4  |
| 5 | 4 | 1 | 4 | 4 | 4 | 0 | 3 | A | 7926.4507  | 14.7 | 14 |
| 5 | 4 | 1 | 5 | 4 | 4 | 0 | 4 | E | 7912.3163  | 0.5  | -2 |
| 5 | 4 | 1 | 6 | 4 | 4 | 0 | 5 | E | 7912.5143  | -6.7 | -5 |
| 5 | 4 | 1 | 4 | 4 | 4 | 0 | 3 | E | 7912.5784  | -5.6 | -2 |
| 5 | 4 | 2 | 5 | 4 | 4 | 1 | 4 | A | 7917.9245  | 6.7  | 4  |
| 5 | 4 | 2 | 6 | 4 | 4 | 1 | 5 | A | 7918.1280  | 4.8  | 3  |
| 5 | 4 | 2 | 4 | 4 | 4 | 1 | 3 | A | 7918.1985  | 12.2 | 11 |
| 5 | 4 | 2 | 5 | 4 | 4 | 1 | 4 | E | 7929.4577  | 5.5  | 2  |
| 6 | 0 | 6 | 6 | 5 | 0 | 5 | 5 | A | 8109.4255  | -1.3 | 0  |
| 6 | 0 | 6 | 5 | 5 | 0 | 5 | 4 | A | 8109.4438  | -2.8 | -2 |
| 6 | 0 | 6 | 7 | 5 | 0 | 5 | 6 | A | 8109.4584  | 1.3  | 2  |
| 6 | 0 | 6 | 6 | 5 | 0 | 5 | 5 | E | 8106.6738  | -0.6 | 0  |
| 6 | 0 | 6 | 5 | 5 | 0 | 5 | 4 | E | 8106.6933  | -1.5 | -1 |
| 6 | 0 | 6 | 7 | 5 | 0 | 5 | 6 | E | 8106.7061  | 0.9  | 2  |
| 6 | 1 | 5 | 6 | 5 | 1 | 4 | 5 | A | 9509.9805  | 2.8  | 0  |
| 6 | 1 | 5 | 7 | 5 | 1 | 4 | 6 | A | 9510.0340  | 3.5  | 0  |
| 6 | 1 | 5 | 5 | 5 | 1 | 4 | 4 | A | 9510.0340  | 0.2  | -3 |
| 6 | 1 | 5 | 6 | 5 | 1 | 4 | 5 | E | 9489.4463  | 1.5  | -1 |
| 6 | 1 | 5 | 7 | 5 | 1 | 4 | 6 | E | 9489.4993  | 3.1  | 1  |
| 6 | 1 | 5 | 5 | 5 | 1 | 4 | 4 | E | 9489.4993  | 0.1  | -1 |
| 6 | 1 | 6 | 6 | 5 | 1 | 5 | 5 | A | 8051.0889  | -2.0 | 0  |
| 6 | 1 | 6 | 5 | 5 | 1 | 5 | 4 | A | 8051.1030  | -2.5 | -1 |
| 6 | 1 | 6 | 7 | 5 | 1 | 5 | 6 | A | 8051.1168  | -0.2 | 2  |
| 6 | 1 | 6 | 6 | 5 | 1 | 5 | 5 | E | 8052.3795  | -1.3 | 1  |
| 6 | 1 | 6 | 5 | 5 | 1 | 5 | 4 | E | 8052.3932  | -3.2 | -1 |
| 6 | 1 | 6 | 7 | 5 | 1 | 5 | 6 | E | 8052.4072  | -0.5 | 1  |
| 6 | 2 | 4 | 6 | 5 | 2 | 3 | 5 | A | 10211.7823 | 0.6  | -2 |
| 6 | 2 | 4 | 7 | 5 | 2 | 3 | 6 | A | 10211.8121 | 1.5  | -1 |
| 6 | 2 | 4 | 5 | 5 | 2 | 3 | 4 | A | 10211.8121 | -2.5 | -5 |
| 6 | 2 | 4 | 6 | 5 | 2 | 3 | 5 | E | 10109.9390 | 3.1  | 1  |
| 6 | 2 | 4 | 7 | 5 | 2 | 3 | 6 | E | 10109.9600 | 3.3  | 1  |
| 6 | 2 | 4 | 5 | 5 | 2 | 3 | 4 | E | 10109.9600 | 1.4  | -1 |
| 6 | 2 | 5 | 6 | 5 | 2 | 4 | 5 | A | 9032.7385  | 0.0  | 2  |
| 6 | 2 | 5 | 7 | 5 | 2 | 4 | 6 | A | 9032.7911  | 1.1  | 3  |
| 6 | 2 | 5 | 5 | 5 | 2 | 4 | 4 | A | 9032.7911  | -1.0 | 1  |
| 6 | 2 | 5 | 6 | 5 | 2 | 4 | 5 | E | 9096.7785  | -1.2 | 1  |
| 6 | 2 | 5 | 7 | 5 | 2 | 4 | 6 | E | 9096.8404  | 0.7  | 2  |
| 6 | 2 | 5 | 5 | 5 | 2 | 4 | 4 | E | 9096.8404  | -3.3 | -3 |
| 6 | 3 | 3 | 6 | 5 | 3 | 2 | 5 | A | 9899.7747  | 0.6  | 2  |
| 6 | 3 | 3 | 7 | 5 | 3 | 2 | 6 | A | 9899.8145  | -1.8 | 0  |
| 6 | 3 | 3 | 5 | 5 | 3 | 2 | 4 | A | 9899.8244  | -0.3 | 1  |
| 6 | 3 | 3 | 6 | 5 | 3 | 2 | 5 | E | 9712.9566  | 0.1  | 0  |



|   |   |   |   |   |   |   |   |   |            |      |     |
|---|---|---|---|---|---|---|---|---|------------|------|-----|
| 6 | 3 | 3 | 7 | 5 | 3 | 2 | 6 | E | 9713.0015  | -4.3 | -1  |
| 6 | 3 | 3 | 5 | 5 | 3 | 2 | 4 | E | 9713.0108  | -4.0 | -1  |
| 6 | 3 | 4 | 6 | 5 | 3 | 3 | 5 | A | 9494.2856  | 2.1  | 2   |
| 6 | 3 | 4 | 7 | 5 | 3 | 3 | 6 | A | 9494.3579  | 2.0  | 3   |
| 6 | 3 | 4 | 5 | 5 | 3 | 3 | 4 | A | 9494.3743  | 6.1  | 7   |
| 6 | 3 | 4 | 6 | 5 | 3 | 3 | 5 | E | 9694.9451  | 3.9  | 3   |
| 6 | 3 | 4 | 7 | 5 | 3 | 3 | 6 | E | 9695.0117  | 4.9  | 2   |
| 6 | 3 | 4 | 5 | 5 | 3 | 3 | 4 | E | 9695.0270  | 8.4  | 5   |
| 6 | 4 | 2 | 6 | 5 | 4 | 1 | 5 | A | 9576.2218  | 1.4  | 1   |
| 6 | 4 | 2 | 7 | 5 | 4 | 1 | 6 | A | 9576.3330  | -0.2 | 0   |
| 6 | 4 | 2 | 5 | 5 | 4 | 1 | 4 | A | 9576.3587  | -0.4 | 0   |
| 6 | 4 | 2 | 6 | 5 | 4 | 1 | 5 | E | 9542.7489  | -4.4 | -3  |
| 6 | 4 | 2 | 7 | 5 | 4 | 1 | 6 | E | 9542.8636  | -5.5 | -2  |
| 6 | 4 | 2 | 5 | 5 | 4 | 1 | 4 | E | 9542.8860  | -9.3 | -5  |
| 6 | 4 | 3 | 6 | 5 | 4 | 2 | 5 | A | 9540.4916  | 1.6  | 1   |
| 6 | 4 | 3 | 7 | 5 | 4 | 2 | 6 | A | 9540.6046  | -2.8 | -3  |
| 6 | 4 | 3 | 5 | 5 | 4 | 2 | 4 | A | 9540.6309  | -3.1 | -3  |
| 6 | 4 | 3 | 6 | 5 | 4 | 2 | 5 | E | 9573.1121  | 10.3 | 7   |
| 6 | 4 | 3 | 7 | 5 | 4 | 2 | 6 | E | 9573.2125  | -3.7 | -9  |
| 6 | 4 | 3 | 5 | 5 | 4 | 2 | 4 | E | 9573.2356  | -6.7 | -13 |
| 6 | 5 | 1 | 6 | 5 | 5 | 0 | 5 | A | 9495.3807  | 0.9  | -2  |
| 6 | 5 | 1 | 7 | 5 | 5 | 0 | 6 | A | 9495.5674  | 1.2  | 0   |
| 6 | 5 | 1 | 5 | 5 | 5 | 0 | 4 | A | 9495.6094  | -3.2 | -4  |
| 6 | 5 | 2 | 6 | 5 | 5 | 1 | 5 | E | 9499.6290  | 9.7  | 4   |
| 6 | 5 | 2 | 7 | 5 | 5 | 1 | 6 | E | 9499.8208  | 15.4 | 7   |
| 6 | 5 | 2 | 5 | 5 | 5 | 1 | 4 | E | 9499.8623  | 10.5 | 2   |
| 7 | 0 | 7 | 7 | 6 | 0 | 6 | 6 | A | 9335.4858  | -2.3 | -2  |
| 7 | 0 | 7 | 6 | 6 | 0 | 6 | 5 | A | 9335.5012  | -1.0 | 0   |
| 7 | 0 | 7 | 8 | 6 | 0 | 6 | 7 | A | 9335.5114  | 0.7  | 1   |
| 7 | 0 | 7 | 7 | 6 | 0 | 6 | 6 | E | 9333.2957  | -2.1 | -2  |
| 7 | 0 | 7 | 6 | 6 | 0 | 6 | 5 | E | 9333.3113  | -0.9 | 0   |
| 7 | 0 | 7 | 8 | 6 | 0 | 6 | 7 | E | 9333.3217  | 1.0  | 2   |
| 7 | 1 | 6 | 7 | 6 | 1 | 5 | 6 | A | 10747.1221 | 0.0  | -1  |
| 7 | 1 | 6 | 8 | 6 | 1 | 5 | 7 | A | 10747.1731 | 0.4  | -1  |
| 7 | 1 | 6 | 6 | 6 | 1 | 5 | 5 | A | 10747.1731 | -1.6 | -3  |
| 7 | 1 | 6 | 7 | 6 | 1 | 5 | 6 | E | 10735.1906 | -0.7 | -3  |
| 7 | 1 | 6 | 8 | 6 | 1 | 5 | 7 | E | 10735.2423 | 0.4  | 0   |
| 7 | 1 | 6 | 6 | 6 | 1 | 5 | 5 | E | 10735.2423 | -1.6 | -2  |
| 7 | 1 | 7 | 7 | 6 | 1 | 6 | 6 | A | 9308.7110  | -2.3 | -1  |
| 7 | 1 | 7 | 6 | 6 | 1 | 6 | 5 | A | 9308.7238  | -1.2 | 0   |
| 7 | 1 | 7 | 8 | 6 | 1 | 6 | 7 | A | 9308.7342  | 0.3  | 2   |
| 7 | 1 | 7 | 7 | 6 | 1 | 6 | 6 | E | 9308.3353  | -2.5 | -1  |
| 7 | 1 | 7 | 6 | 6 | 1 | 6 | 5 | E | 9308.3493  | -0.7 | 1   |
| 7 | 1 | 7 | 8 | 6 | 1 | 6 | 7 | E | 9308.3600  | 1.2  | 3   |
| 7 | 2 | 5 | 7 | 6 | 2 | 4 | 6 | A | 11826.4375 | -3.0 | -4  |
| 7 | 2 | 5 | 8 | 6 | 2 | 4 | 7 | A | 11826.4680 | -3.6 | -5  |
| 7 | 2 | 5 | 6 | 6 | 2 | 4 | 5 | A | 11826.4680 | -6.7 | -8  |
| 7 | 2 | 5 | 7 | 6 | 2 | 4 | 6 | E | 11747.4375 | -2.8 | -1  |

|   |   |   |   |   |   |   |   |   |            |       |     |
|---|---|---|---|---|---|---|---|---|------------|-------|-----|
| 7 | 2 | 5 | 8 | 6 | 2 | 4 | 7 | E | 11747.4649 | -1.3  | -1  |
| 7 | 2 | 5 | 6 | 6 | 2 | 4 | 5 | E | 11747.4649 | -3.5  | -3  |
| 7 | 2 | 6 | 7 | 6 | 2 | 5 | 6 | A | 10395.1520 | 0.2   | 4   |
| 7 | 2 | 6 | 8 | 6 | 2 | 5 | 7 | A | 10395.1924 | -0.5  | 3   |
| 7 | 2 | 6 | 6 | 6 | 2 | 5 | 5 | A | 10395.1924 | -0.4  | 3   |
| 7 | 2 | 6 | 7 | 6 | 2 | 5 | 6 | E | 10421.1487 | -1.6  | 3   |
| 7 | 2 | 6 | 8 | 6 | 2 | 5 | 7 | E | 10421.1939 | -0.9  | 3   |
| 7 | 2 | 6 | 6 | 6 | 2 | 5 | 5 | E | 10421.1939 | -1.5  | 2   |
| 7 | 3 | 4 | 7 | 6 | 3 | 3 | 6 | A | 11765.1705 | -6.1  | -2  |
| 7 | 3 | 4 | 8 | 6 | 3 | 3 | 7 | A | 11765.1915 | -4.0  | 1   |
| 7 | 3 | 4 | 6 | 6 | 3 | 3 | 5 | A | 11765.1915 | -6.6  | -2  |
| 7 | 3 | 4 | 7 | 6 | 3 | 3 | 6 | E | 11541.8692 | -4.4  | -2  |
| 7 | 3 | 4 | 8 | 6 | 3 | 3 | 7 | E | 11541.8870 | -2.0  | 2   |
| 7 | 3 | 4 | 6 | 6 | 3 | 3 | 5 | E | 11541.8870 | -3.4  | 1   |
| 7 | 3 | 5 | 7 | 6 | 3 | 4 | 6 | A | 11032.9521 | -1.1  | 2   |
| 7 | 3 | 5 | 8 | 6 | 3 | 4 | 7 | A | 11033.0006 | -3.5  | 0   |
| 7 | 3 | 5 | 6 | 6 | 3 | 4 | 5 | A | 11033.0085 | -1.2  | 2   |
| 7 | 3 | 5 | 7 | 6 | 3 | 4 | 6 | E | 11264.5671 | -2.2  | 1   |
| 7 | 3 | 5 | 8 | 6 | 3 | 4 | 7 | E | 11264.6246 | -0.7  | 0   |
| 7 | 3 | 5 | 6 | 6 | 3 | 4 | 5 | E | 11264.6335 | 1.2   | 2   |
| 7 | 4 | 3 | 7 | 6 | 4 | 2 | 6 | A | 11281.4615 | -3.5  | 0   |
| 7 | 4 | 3 | 8 | 6 | 4 | 2 | 7 | A | 11281.5229 | -5.4  | -2  |
| 7 | 4 | 3 | 6 | 6 | 4 | 2 | 5 | A | 11281.5396 | 0.2   | 4   |
| 7 | 4 | 3 | 7 | 6 | 4 | 2 | 6 | E | 11203.3777 | -9.6  | -4  |
| 7 | 4 | 3 | 8 | 6 | 4 | 2 | 7 | E | 11203.4433 | -12.7 | -6  |
| 7 | 4 | 3 | 6 | 6 | 4 | 2 | 5 | E | 11203.4623 | -5.4  | 2   |
| 7 | 4 | 4 | 8 | 6 | 4 | 3 | 7 | A | 11170.1914 | -4.9  | -2  |
| 7 | 4 | 4 | 6 | 6 | 4 | 3 | 5 | A | 11170.2094 | 0.7   | 3   |
| 7 | 4 | 4 | 7 | 6 | 4 | 3 | 6 | E | 11251.1448 | 7.6   | 7   |
| 7 | 4 | 4 | 8 | 6 | 4 | 3 | 7 | E | 11251.2112 | 6.3   | 4   |
| 7 | 4 | 4 | 6 | 6 | 4 | 3 | 5 | E | 11251.2246 | 8.0   | 6   |
| 7 | 5 | 2 | 7 | 6 | 5 | 1 | 6 | A | 11124.2054 | -0.4  | 0   |
| 7 | 5 | 2 | 8 | 6 | 5 | 1 | 7 | A | 11124.3122 | -8.9  | -8  |
| 7 | 5 | 2 | 6 | 6 | 5 | 1 | 5 | A | 11124.3403 | -3.5  | -2  |
| 7 | 5 | 2 | 7 | 6 | 5 | 1 | 6 | E | 11107.3588 | -9.8  | -5  |
| 7 | 5 | 2 | 8 | 6 | 5 | 1 | 7 | E | 11107.4729 | -11.7 | -5  |
| 7 | 5 | 2 | 6 | 6 | 5 | 1 | 5 | E | 11107.4982 | -9.1  | -2  |
| 7 | 5 | 3 | 7 | 6 | 5 | 2 | 6 | A | 11118.4883 | 1.1   | 1   |
| 7 | 5 | 3 | 8 | 6 | 5 | 2 | 7 | A | 11118.5965 | -6.8  | -6  |
| 7 | 5 | 3 | 6 | 6 | 5 | 2 | 5 | A | 11118.6229 | -3.1  | -2  |
| 7 | 5 | 3 | 7 | 6 | 5 | 2 | 6 | E | 11130.4885 | 14.7  | 10  |
| 7 | 5 | 3 | 8 | 6 | 5 | 2 | 7 | E | 11130.5429 | -46.1 | 5   |
| 7 | 5 | 3 | 6 | 6 | 5 | 2 | 5 | E | 11130.5996 | -12.0 | -18 |
| 7 | 6 | 1 | 7 | 6 | 6 | 0 | 6 | A | 11069.3415 | 3.6   | 2   |
| 7 | 6 | 1 | 8 | 6 | 6 | 0 | 7 | A | 11069.5148 | 6.6   | 6   |
| 7 | 6 | 1 | 6 | 6 | 6 | 0 | 5 | A | 11069.5392 | -4.7  | -5  |
| 7 | 6 | 2 | 7 | 6 | 6 | 1 | 6 | A | 11069.2089 | -4.9  | -7  |
| 7 | 6 | 2 | 8 | 6 | 6 | 1 | 7 | A | 11069.3824 | -1.7  | -3  |

|    |   |    |    |   |   |   |    |   |            |      |     |
|----|---|----|----|---|---|---|----|---|------------|------|-----|
| 7  | 6 | 2  | 6  | 6 | 6 | 1 | 5  | A | 11069.4263 | 6.5  | 6   |
| 7  | 6 | 2  | 7  | 6 | 6 | 1 | 6  | E | 11072.4218 | 13.7 | 6   |
| 7  | 6 | 2  | 8  | 6 | 6 | 1 | 7  | E | 11072.5936 | 15.5 | 6   |
| 7  | 6 | 2  | 6  | 6 | 6 | 1 | 5  | E | 11072.6212 | 7.4  | -3  |
| 8  | 0 | 8  | 8  | 7 | 0 | 7 | 7  | A | 10569.9750 | -5.6 | -6  |
| 8  | 0 | 8  | 7  | 7 | 0 | 7 | 6  | A | 10569.9981 | 7.1  | 7   |
| 8  | 0 | 8  | 8  | 7 | 0 | 7 | 7  | E | 10568.0703 | -3.3 | -4  |
| 8  | 0 | 8  | 7  | 7 | 0 | 7 | 6  | E | 10568.0848 | 0.5  | 0   |
| 8  | 0 | 8  | 9  | 7 | 0 | 7 | 8  | E | 10568.0922 | 1.0  | 1   |
| 8  | 1 | 7  | 8  | 7 | 1 | 6 | 7  | A | 11933.5782 | -0.4 | 1   |
| 8  | 1 | 7  | 9  | 7 | 1 | 6 | 8  | A | 11933.6211 | -0.8 | 0   |
| 8  | 1 | 7  | 7  | 7 | 1 | 6 | 6  | A | 11933.6211 | -1.4 | 0   |
| 8  | 1 | 7  | 8  | 7 | 1 | 6 | 7  | E | 11924.8234 | -0.9 | 0   |
| 8  | 1 | 7  | 9  | 7 | 1 | 6 | 8  | E | 11924.8682 | 0.3  | 2   |
| 8  | 1 | 7  | 7  | 7 | 1 | 6 | 6  | E | 11924.8682 | -0.3 | 1   |
| 8  | 1 | 8  | 8  | 7 | 1 | 7 | 7  | A | 10558.4278 | -4.6 | -4  |
| 8  | 1 | 8  | 7  | 7 | 1 | 7 | 6  | A | 10558.4399 | -2.0 | -2  |
| 8  | 1 | 8  | 9  | 7 | 1 | 7 | 8  | A | 10558.4492 | 0.2  | 0   |
| 8  | 1 | 8  | 8  | 7 | 1 | 7 | 7  | E | 10557.3054 | -2.9 | -3  |
| 8  | 1 | 8  | 7  | 7 | 1 | 7 | 6  | E | 10557.3166 | -1.4 | -1  |
| 8  | 1 | 8  | 9  | 7 | 1 | 7 | 8  | E | 10557.3260 | 0.9  | 1   |
| 9  | 0 | 9  | 9  | 8 | 0 | 8 | 8  | A | 11809.0607 | -3.7 | -6  |
| 9  | 0 | 9  | 10 | 8 | 0 | 8 | 9  | A | 11809.0794 | 1.1  | -1  |
| 9  | 0 | 9  | 8  | 8 | 0 | 8 | 7  | A | 11809.0794 | 6.9  | 5   |
| 9  | 0 | 9  | 9  | 8 | 0 | 8 | 8  | E | 11807.2632 | -1.4 | -4  |
| 9  | 0 | 9  | 8  | 8 | 0 | 8 | 7  | E | 11807.2632 | -9.6 | -12 |
| 9  | 0 | 9  | 10 | 8 | 0 | 8 | 9  | E | 11807.2798 | 1.2  | -1  |
| 9  | 1 | 8  | 9  | 8 | 1 | 7 | 8  | A | 13121.9479 | 1.1  | 6   |
| 9  | 1 | 8  | 10 | 8 | 1 | 7 | 9  | A | 13121.9816 | -0.3 | 4   |
| 9  | 1 | 8  | 8  | 8 | 1 | 7 | 7  | A | 13121.9816 | 0.2  | 5   |
| 9  | 1 | 8  | 9  | 8 | 1 | 7 | 8  | E | 13114.6922 | -0.6 | 4   |
| 9  | 1 | 8  | 10 | 8 | 1 | 7 | 9  | E | 13114.7257 | -2.4 | 2   |
| 9  | 1 | 8  | 8  | 8 | 1 | 7 | 7  | E | 13114.7257 | -1.9 | 3   |
| 9  | 1 | 9  | 9  | 8 | 1 | 8 | 8  | A | 11804.2883 | -0.4 | -2  |
| 9  | 1 | 9  | 8  | 8 | 1 | 8 | 7  | A | 11804.2970 | 0.5  | -2  |
| 9  | 1 | 9  | 10 | 8 | 1 | 8 | 9  | A | 11804.3053 | 3.0  | 1   |
| 9  | 1 | 9  | 9  | 8 | 1 | 8 | 8  | E | 11802.8157 | 0.5  | -1  |
| 9  | 1 | 9  | 8  | 8 | 1 | 8 | 7  | E | 11802.8240 | 0.9  | -1  |
| 9  | 1 | 9  | 10 | 8 | 1 | 8 | 9  | E | 11802.8324 | 3.4  | 2   |
| 10 | 0 | 10 | 10 | 9 | 0 | 9 | 9  | A | 13050.3358 | 1.1  | -4  |
| 10 | 0 | 10 | 9  | 9 | 0 | 9 | 8  | A | 13050.3445 | 3.2  | -2  |
| 10 | 0 | 10 | 11 | 9 | 0 | 9 | 10 | A | 13050.3504 | 4.2  | -1  |
| 10 | 0 | 10 | 10 | 9 | 0 | 9 | 9  | E | 13048.5670 | 9.1  | 4   |
| 10 | 0 | 10 | 9  | 9 | 0 | 9 | 8  | E | 13048.5755 | 11.0 | 6   |
| 10 | 0 | 10 | 11 | 9 | 0 | 9 | 10 | E | 13048.5806 | 11.2 | 6   |

**Table S6.** Rotational constants of 4MNP-1 calculated at different levels of theory. The difference between the calculated and the experimental (in MHz) are given as  $\Delta A$ ,  $\Delta B$  and  $\Delta C$ .  $\Sigma$  is the sum of the absolute values of  $\Delta A$ ,  $\Delta B$  and  $\Delta C$ .

| Method/Basis set             | $A$    | $\Delta A$ | $B$   | $\Delta B$ | $C$   | $\Delta C$ | $\Sigma$ |
|------------------------------|--------|------------|-------|------------|-------|------------|----------|
| B3LYP-D3/6-31G(d,p)          | 1843.5 | 1.8        | 928.1 | -4.0       | 619.7 | -1.9       | 7.6      |
| B3LYP-D3/6-31+G(d,p)         | 1837.8 | -4.0       | 926.7 | -5.4       | 618.4 | -3.1       | 12.5     |
| B3LYP-D3/6-31++G(d,p)        | 1837.8 | -4.0       | 926.7 | -5.4       | 618.4 | -3.2       | 12.5     |
| B3LYP-D3/6-311G(d,p)         | 1844.2 | 2.5        | 930.0 | -2.1       | 620.6 | -0.9       | 5.5      |
| B3LYP-D3/6-311+G(d,p)        | 1841.9 | 0.1        | 929.7 | -2.3       | 620.2 | -1.3       | 3.8      |
| B3LYP-D3/6-311++G(d,p)       | 1841.9 | 0.2        | 929.7 | -2.3       | 620.2 | -1.3       | 3.8      |
| B3LYP-D3/6-311G(2d,2p)       | 1852.8 | 11.1       | 932.4 | 0.4        | 622.7 | 1.1        | 12.6     |
| B3LYP-D3/6-311+G(2d,2p)      | 1850.3 | 8.5        | 932.4 | 0.3        | 622.4 | 0.8        | 9.7      |
| B3LYP-D3/6-311++G(2d,2p)     | 1850.3 | 8.6        | 932.4 | 0.3        | 622.4 | 0.8        | 9.7      |
| B3LYP-D3/6-311G(df,pd)       | 1851.5 | 9.7        | 932.2 | 0.2        | 622.4 | 0.9        | 10.8     |
| B3LYP-D3/6-311+G(df,pd)      | 1849.0 | 7.3        | 932.1 | 0.0        | 622.1 | 0.5        | 7.8      |
| B3LYP-D3/6-311++G(df,pd)     | 1849.1 | 7.4        | 932.1 | 0.0        | 622.1 | 0.5        | 7.9      |
| B3LYP-D3/6-311G(2df,2pd)     | 1856.8 | 15.1       | 933.6 | 1.5        | 623.6 | 2.1        | 18.7     |
| B3LYP-D3/6-311+G(2df,2pd)    | 1854.6 | 12.9       | 933.4 | 1.3        | 623.3 | 1.7        | 15.9     |
| B3LYP-D3/6-311++G(2df,2pd)   | 1854.7 | 12.9       | 933.4 | 1.3        | 623.3 | 1.7        | 15.9     |
| B3LYP-D3/6-311G(3df,3pd)     | 1857.3 | 15.5       | 933.6 | 1.6        | 623.7 | 2.1        | 19.2     |
| B3LYP-D3/6-311+G(3df,3pd)    | 1855.5 | 13.7       | 933.7 | 1.7        | 623.5 | 2.0        | 17.4     |
| B3LYP-D3/6-311++G(3df,3pd)   | 1855.5 | 13.8       | 933.8 | 1.7        | 623.6 | 2.0        | 17.5     |
| B3LYP-D3/cc-pVDZ             | 1844.4 | 2.6        | 925.2 | -6.8       | 618.5 | -3.0       | 12.5     |
| B3LYP-D3/aug-cc-pVDZ         | 1840.0 | 1.8        | 925.5 | -6.6       | 618.1 | -3.5       | 11.9     |
| B3LYP-D3/cc-pVTZ             | 1855.4 | 13.6       | 933.0 | 0.9        | 623.2 | 1.6        | 16.2     |
| B3LYP-D3/aug-cc-pVTZ         | 1854.5 | 12.7       | 933.3 | 1.2        | 623.2 | 1.6        | 15.5     |
|                              |        |            |       |            |       |            |          |
| B3LYP-D3BJ/6-31G(d,p)        | 1847.8 | 6.0        | 930.4 | -1.6       | 621.2 | -0.4       | 8.0      |
| B3LYP-D3BJ/6-31+G(d,p)       | 1842.3 | 0.6        | 929.1 | -3.0       | 620.0 | -1.6       | 5.1      |
| B3LYP-D3BJ/6-31++G(d,p)      | 1842.3 | 0.5        | 929.1 | -3.0       | 620.0 | -1.6       | 5.1      |
| B3LYP-D3BJ/6-311G(d,p)       | 1848.5 | 6.7        | 932.4 | 0.4        | 622.2 | 0.6        | 7.7      |
| B3LYP-D3BJ/6-311+G(d,p)      | 1846.2 | 4.5        | 932.2 | 0.2        | 621.8 | 0.3        | 4.9      |
| B3LYP-D3BJ/6-311++G(d,p)     | 1846.2 | 4.5        | 932.2 | 0.1        | 621.8 | 0.3        | 4.9      |
| B3LYP-D3BJ/6-311G(2d,2p)     | 1857.0 | 15.3       | 934.9 | 2.9        | 624.2 | 2.7        | 20.8     |
| B3LYP-D3BJ/6-311+G(2d,2p)    | 1854.7 | 12.9       | 934.8 | 2.8        | 623.9 | 2.4        | 18.0     |
| B3LYP-D3BJ/6-311++G(2d,2p)   | 1854.7 | 12.9       | 934.8 | 2.8        | 623.9 | 2.4        | 18.1     |
| B3LYP-D3BJ/6-311G(df,pd)     | 1855.8 | 14.0       | 934.7 | 2.6        | 624.0 | 2.4        | 19.1     |
| B3LYP-D3BJ/6-311+G(df,pd)    | 1853.5 | 11.8       | 934.5 | 2.5        | 623.7 | 2.1        | 16.3     |
| B3LYP-D3BJ/6-311++G(df,pd)   | 1853.6 | 11.8       | 934.5 | 2.4        | 623.7 | 2.1        | 16.4     |
| B3LYP-D3BJ/6-311G(2df,2pd)   | 1857.0 | 15.3       | 934.9 | 2.9        | 624.2 | 2.7        | 20.8     |
| B3LYP-D3BJ/6-311+G(2df,2pd)  | 1854.7 | 12.9       | 934.8 | 2.8        | 623.9 | 2.4        | 18.0     |
| B3LYP-D3BJ/6-311++G(2df,2pd) | 1854.7 | 12.9       | 934.8 | 2.8        | 623.9 | 2.4        | 18.1     |
| B3LYP-D3BJ/6-311G(3df,3pd)   | 1861.5 | 19.7       | 936.1 | 4.1        | 625.3 | 3.7        | 27.5     |
| B3LYP-D3BJ/6-311+G(3df,3pd)  | 1859.8 | 18.1       | 936.2 | 4.2        | 625.2 | 3.6        | 25.8     |
| B3LYP-D3BJ/6-311++G(3df,3pd) | 1859.8 | 18.0       | 936.2 | 4.2        | 625.1 | 3.6        | 25.8     |
| B3LYP-D3BJ/cc-pVDZ           | 1848.4 | 6.6        | 927.7 | -4.4       | 620.1 | -1.5       | 12.5     |
| B3LYP-D3BJ/aug-cc-pVDZ       | 1844.3 | 2.5        | 927.9 | -4.1       | 619.7 | -1.8       | 8.5      |
| B3LYP-D3BJ/cc-pVTZ           | 1859.5 | 17.8       | 935.5 | 3.4        | 624.8 | 3.2        | 24.4     |

|                              |        |       |       |       |       |      |      |
|------------------------------|--------|-------|-------|-------|-------|------|------|
| B3LYP-D3BJ/aug-cc-pVTZ       | 1858.7 | 17.0  | 935.8 | 3.7   | 624.8 | 3.3  | 24.0 |
|                              |        |       |       |       |       |      |      |
| CAM-B3LYP-D3BJ/6-311G(d,p)   | 1862.3 | 20.5  | 939.5 | 7.5   | 626.9 | 5.3  | 33.3 |
| CAM-B3LYP-D3BJ/6-311+G(d,p)  | 1859.8 | 18.0  | 939.3 | 7.2   | 626.5 | 4.9  | 30.2 |
| CAM-B3LYP-D3BJ/6-311++G(d,p) | 1859.8 | 18.0  | 939.3 | 7.2   | 626.5 | 5.0  | 30.2 |
| CAM-B3LYP-D3BJ/cc-pVDZ       | 1861.9 | 20.1  | 934.9 | 2.9   | 624.8 | 3.3  | 26.3 |
| CAM-B3LYP-D3BJ/aug-cc-pVDZ   | 1857.5 | 15.7  | 935.0 | 2.9   | 624.4 | 2.8  | 21.5 |
| CAM-B3LYP-D3BJ/cc-pVTZ       | 1873.1 | 31.3  | 942.6 | 10.6  | 629.5 | 7.9  | 49.8 |
| CAM-B3LYP-D3BJ/aug-cc-pVTZ   | 1872.1 | 30.3  | 942.9 | 10.8  | 629.5 | 7.9  | 49.1 |
|                              |        |       |       |       |       |      |      |
| CCSD/cc-pVDZ                 | 1823.7 | -18.0 | 921.9 | -10.1 | 614.8 | -6.8 | 35.0 |
|                              |        |       |       |       |       |      |      |
| M06-2X/6-31G(d,p)            | 1849.1 | 7.3   | 936.8 | 4.7   | 624.2 | 2.6  | 14.7 |
| M06-2X/6-31+G(d,p)           | 1843.6 | 1.9   | 935.6 | 3.6   | 623.1 | 1.5  | 7.0  |
| M06-2X/6-31++G(d,p)          | 1843.6 | 1.9   | 935.6 | 3.5   | 623.0 | 1.5  | 6.9  |
| M06-2X/6-311G(d,p)           | 1850.2 | 8.5   | 938.0 | 5.9   | 624.8 | 3.3  | 17.6 |
| M06-2X/6-311+G(d,p)          | 1848.2 | 6.4   | 937.7 | 5.6   | 624.5 | 2.9  | 14.9 |
| M06-2X/6-311++G(d,p)         | 1848.1 | 6.4   | 937.7 | 5.6   | 624.5 | 2.9  | 15.0 |
| M06-2X/6-311G(2d,2p)         | 1858.3 | 16.6  | 940.1 | 8.1   | 626.7 | 5.1  | 29.8 |
| M06-2X/6-311+G(2d,2p)        | 1855.9 | 14.2  | 940.0 | 7.9   | 626.4 | 4.8  | 26.9 |
| M06-2X/6-311++G(2d,2p)       | 1856.0 | 14.2  | 940.0 | 7.9   | 626.4 | 4.8  | 27.0 |
| M06-2X/6-311G(df,pd)         | 1857.5 | 15.7  | 939.4 | 7.3   | 626.3 | 4.7  | 27.8 |
| M06-2X/6-311+G(df,pd)        | 1854.9 | 13.1  | 939.2 | 7.2   | 625.9 | 4.4  | 24.7 |
| M06-2X/6-311++G(df,pd)       | 1854.9 | 13.1  | 939.3 | 7.2   | 625.9 | 4.4  | 24.7 |
| M06-2X/6-311G(2df,2pd)       | 1863.6 | 21.8  | 940.6 | 8.6   | 627.5 | 6.0  | 36.4 |
| M06-2X/6-311+G(2df,2pd)      | 1861.2 | 19.4  | 940.4 | 8.4   | 627.2 | 5.6  | 33.4 |
| M06-2X/6-311++G(2df,2pd)     | 1861.2 | 19.4  | 940.4 | 8.4   | 627.2 | 5.6  | 33.4 |
| M06-2X/6-311G(3df,3pd)       | 1863.4 | 21.6  | 940.5 | 8.4   | 627.4 | 5.9  | 35.9 |
| M06-2X/6-311+G(3df,3pd)      | 1861.6 | 19.8  | 940.6 | 8.6   | 627.3 | 5.7  | 34.1 |
| M06-2X/6-311++G(3df,3pd)     | 1861.6 | 19.8  | 940.6 | 8.6   | 627.3 | 5.7  | 34.1 |
| M06-2X/cc-pVDZ               | 1851.7 | 9.9   | 934.6 | 2.5   | 623.5 | 2.0  | 14.4 |
| M06-2X/aug-cc-pVDZ           | 1847.8 | 6.0   | 934.2 | 2.1   | 622.9 | 1.3  | 9.4  |
| M06-2X/cc-pVTZ               | 1862.3 | 20.5  | 940.3 | 8.2   | 627.2 | 5.7  | 34.4 |
| M06-2X/aug-cc-pVTZ           | 1861.0 | 19.2  | 940.6 | 8.5   | 627.2 | 5.7  | 33.4 |
|                              |        |       |       |       |       |      |      |
| MN15/6-31G(d,p)              | 1845.2 | 3.5   | 934.2 | 2.1   | 622.6 | 1.0  | 6.6  |
| MN15/6-31+G(d,p)             | 1839.5 | -2.2  | 932.7 | 0.6   | 621.3 | -0.3 | 3.1  |
| MN15/6-31++G(d,p)            | 1839.5 | -2.2  | 932.7 | 0.6   | 621.3 | -0.3 | 3.1  |
| MN15/6-311G(d,p)             | 1849.0 | 7.2   | 937.0 | 5.0   | 624.3 | 2.7  | 14.9 |
| MN15/6-311+G(d,p)            | 1846.8 | 5.1   | 936.7 | 4.7   | 623.9 | 2.3  | 12.0 |
| MN15/6-311++G(d,p)           | 1846.8 | 5.0   | 936.8 | 4.7   | 623.9 | 2.4  | 12.1 |
| MN15/6-311G(2d,2p)           | 1857.4 | 15.6  | 939.5 | 7.4   | 626.3 | 4.8  | 27.8 |
| MN15/6-311+G(2d,2p)          | 1855.1 | 13.4  | 939.3 | 7.2   | 626.0 | 4.4  | 25.0 |
| MN15/6-311++G(2d,2p)         | 1855.2 | 13.4  | 939.3 | 7.2   | 626.0 | 4.4  | 25.0 |
| MN15/6-311G(df,pd)           | 1855.6 | 13.8  | 939.8 | 7.7   | 626.2 | 4.7  | 26.2 |
| MN15/6-311+G(df,pd)          | 1853.2 | 11.5  | 939.4 | 7.4   | 625.8 | 4.3  | 23.1 |
| MN15/6-311++G(df,pd)         | 1853.2 | 11.4  | 939.5 | 7.4   | 625.8 | 4.3  | 23.1 |
| MN15/6-311G(2df,2pd)         | 1860.8 | 19.0  | 940.6 | 8.6   | 627.2 | 5.6  | 33.2 |
| MN15/6-311+G(2df,2pd)        | 1858.8 | 17.1  | 940.3 | 8.2   | 626.8 | 5.3  | 30.6 |
| MN15/6-311++G(2df,2pd)       | 1858.8 | 17.1  | 940.3 | 8.2   | 626.8 | 5.3  | 30.6 |

|                           |        |      |       |       |       |      |      |
|---------------------------|--------|------|-------|-------|-------|------|------|
| MN15/6-311G(3df,3pd)      | 1861.8 | 20.1 | 941.0 | 8.9   | 627.5 | 5.9  | 34.9 |
| MN15/6-311+G(3df,3pd)     | 1860.4 | 18.7 | 941.0 | 8.9   | 627.3 | 5.8  | 33.4 |
| MN15/6-311++G(3df,3pd)    | 1860.5 | 18.7 | 941.0 | 8.9   | 627.3 | 5.8  | 33.4 |
| MN15/cc-pVDZ              | 1849.3 | 7.6  | 932.3 | 0.2   | 622.2 | 0.7  | 8.4  |
| MN15/aug-cc-pVDZ          | 1845.2 | 3.4  | 932.7 | 0.7   | 622.0 | 0.4  | 4.5  |
| MN15/cc-pVTZ              | 1860.5 | 18.7 | 940.4 | 8.4   | 627.1 | 5.5  | 32.6 |
| MN15/aug-cc-pVTZ          | 1860.5 | 18.7 | 941.1 | 9.0   | 627.4 | 5.8  | 33.5 |
|                           |        |      |       |       |       |      |      |
| PBE0/6-31G(d,p)           | 1837.9 | -3.8 | 920.3 | -11.8 | 615.6 | -6.0 | 21.6 |
| PBE0/6-31+G(d,p)          | 1833.0 | -8.7 | 918.8 | -13.2 | 614.4 | -7.2 | 29.1 |
| PBE0/6-31++G(d,p)         | 1833.0 | -8.8 | 918.8 | -13.2 | 614.4 | -7.2 | 29.1 |
| PBE0/6-311G(d,p)          | 1838.3 | -3.4 | 922.6 | -9.4  | 616.7 | -4.9 | 17.7 |
| PBE0/6-311+G(d,p)         | 1836.1 | -5.6 | 922.3 | -9.7  | 616.3 | -5.2 | 20.6 |
| PBE0/6-311++G(d,p)        | 1836.2 | -5.6 | 922.4 | -9.7  | 616.3 | -5.2 | 20.5 |
| PBE0/6-311G(2d,2p)        | 1846.9 | 5.1  | 924.6 | -7.5  | 618.5 | -3.0 | 15.6 |
| PBE0/6-311+G(2d,2p)       | 1844.6 | 2.8  | 924.6 | -7.5  | 618.2 | -3.3 | 13.6 |
| PBE0/6-311++G(2d,2p)      | 1844.6 | 2.9  | 924.5 | -7.5  | 618.2 | -3.3 | 13.7 |
| PBE0/6-311G(df,pd)        | 1845.5 | 3.8  | 924.7 | -7.4  | 618.4 | -3.1 | 14.3 |
| PBE0/6-311+G(df,pd)       | 1843.5 | 1.7  | 924.4 | -7.7  | 618.1 | -3.5 | 12.9 |
| PBE0/6-311++G(df,pd)      | 1843.5 | 1.8  | 924.4 | -7.7  | 618.1 | -3.5 | 12.9 |
| PBE0/6-311G(2df,2pd)      | 1850.5 | 8.7  | 925.8 | -6.3  | 619.4 | -2.1 | 17.1 |
| PBE0/6-311+G(2df,2pd)     | 1848.7 | 6.9  | 925.5 | -6.5  | 619.1 | -2.4 | 15.9 |
| PBE0/6-311++G(2df,2pd)    | 1848.7 | 6.9  | 925.5 | -6.5  | 619.1 | -2.4 | 15.9 |
| PBE0/6-311G(3df,3pd)      | 1851.2 | 9.5  | 925.9 | -6.2  | 619.6 | -2.0 | 17.6 |
| PBE0/6-311+G(3df,3pd)     | 1849.6 | 7.8  | 926.0 | -6.1  | 619.4 | -2.1 | 16.0 |
| PBE0/6-311++G(3df,3pd)    | 1849.6 | 7.8  | 926.0 | -6.1  | 619.4 | -2.1 | 16.0 |
| PBE0/cc-pVDZ              | 1839.3 | -2.4 | 918.1 | -14.0 | 614.8 | -6.8 | 23.2 |
| PBE0/aug-cc-pVDZ          | 1834.5 | -7.3 | 918.3 | -13.7 | 614.4 | -7.2 | 28.2 |
| PBE0/cc-pVTZ              | 1849.2 | 7.4  | 925.1 | -6.9  | 619.0 | -2.5 | 16.9 |
| PBE0/aug-cc-pVTZ          | 1848.3 | 6.5  | 925.4 | -6.7  | 619.0 | -2.5 | 15.7 |
|                           |        |      |       |       |       |      |      |
| PBE0-D3/6-31G(d,p)        | 1837.4 | -4.3 | 920.1 | -12.0 | 615.5 | -6.1 | 22.4 |
| PBE0-D3/6-31+G(d,p)       | 1832.4 | -9.4 | 918.7 | -13.3 | 614.3 | -7.3 | 30.0 |
| PBE0-D3/6-31++G(d,p)      | 1832.4 | -9.4 | 918.7 | -13.3 | 614.3 | -7.3 | 30.0 |
| PBE0-D3/6-311G(d,p)       | 1837.8 | -4.0 | 922.5 | -9.6  | 616.6 | -5.0 | 18.6 |
| PBE0-D3/6-311+G(d,p)      | 1835.6 | -6.2 | 922.2 | -9.9  | 616.2 | -5.4 | 21.4 |
| PBE0-D3/6-311++G(d,p)     | 1835.6 | -6.2 | 922.2 | -9.9  | 616.2 | -5.4 | 21.4 |
| PBE0-D3/6-311G(2d,2p)     | 1846.2 | 4.5  | 924.5 | -7.6  | 618.4 | -3.2 | 15.2 |
| PBE0-D3/6-311+G(2d,2p)    | 1844.0 | 2.3  | 924.4 | -7.7  | 618.1 | -3.5 | 13.4 |
| PBE0-D3/6-311++G(2d,2p)   | 1844.1 | 2.3  | 924.4 | -7.7  | 618.1 | -3.4 | 13.4 |
| PBE0-D3/6-311G(df,pd)     | 1845.0 | 3.2  | 924.5 | -7.5  | 618.3 | -3.3 | 14.1 |
| PBE0-D3/6-311+G(df,pd)    | 1842.9 | 1.2  | 924.2 | -7.9  | 617.9 | -3.6 | 12.7 |
| PBE0-D3/6-311++G(df,pd)   | 1842.9 | 1.2  | 924.2 | -7.8  | 617.9 | -3.6 | 12.7 |
| PBE0-D3/6-311G(2df,2pd)   | 1850.0 | 8.2  | 925.6 | -6.5  | 619.3 | -2.2 | 17.0 |
| PBE0-D3/6-311+G(2df,2pd)  | 1848.2 | 6.4  | 925.4 | -6.7  | 619.0 | -2.6 | 15.7 |
| PBE0-D3/6-311++G(2df,2pd) | 1848.2 | 6.4  | 925.4 | -6.7  | 619.0 | -2.5 | 15.7 |
| PBE0-D3/6-311G(3df,3pd)   | 1850.8 | 9.0  | 925.7 | -6.4  | 619.4 | -2.1 | 17.5 |
| PBE0-D3/6-311+G(3df,3pd)  | 1849.1 | 7.3  | 925.8 | -6.3  | 619.3 | -2.3 | 15.9 |
| PBE0-D3/6-311++G(3df,3pd) | 1849.1 | 7.3  | 925.8 | -6.3  | 619.3 | -2.3 | 15.9 |
| PBE0-D3/cc-pVDZ           | 1838.9 | -2.8 | 917.9 | -14.2 | 614.7 | -6.9 | 23.9 |

|                                   |               |       |              |       |              |      |      |
|-----------------------------------|---------------|-------|--------------|-------|--------------|------|------|
| PBE0-D3/aug-cc-pVDZ               | 1834.0        | -7.8  | 918.2        | -13.9 | 614.2        | -7.3 | 29.0 |
| PBE0-D3/cc-pVTZ                   | 1848.8        | 7.0   | 925.0        | -7.1  | 618.9        | -2.7 | 16.8 |
| PBE0-D3/aug-cc-pVTZ               | 1847.8        | 6.0   | 925.2        | -6.9  | 618.9        | -2.7 | 15.5 |
|                                   |               |       |              |       |              |      |      |
| $\omega$ B97X-D/6-31G(d,p)        | 1852.7        | 11.0  | 935.7        | 3.6   | 624.1        | 2.5  | 17.1 |
| $\omega$ B97X-D/6-31+G(d,p)       | 1848.1        | 6.3   | 934.7        | 2.6   | 623.1        | 1.6  | 10.6 |
| $\omega$ B97X-D/6-31++G(d,p)      | 1848.1        | 6.3   | 934.7        | 2.6   | 623.1        | 1.6  | 10.5 |
| $\omega$ B97X-D-6-311G(d,p)       | 1854.5        | 12.7  | 937.6        | 5.6   | 625.2        | 3.6  | 21.9 |
| $\omega$ B97X-D-6-311+G(d,p)      | 1852.5        | 10.7  | 937.5        | 5.5   | 624.9        | 3.4  | 19.6 |
| $\omega$ B97X-D-6-311++G(d,p)     | 1852.5        | 10.8  | 937.5        | 5.5   | 624.9        | 3.3  | 19.6 |
| $\omega$ B97X-D/6-311G(2d,2p)     | 1862.7        | 21.0  | 939.9        | 7.8   | 627.1        | 5.5  | 34.3 |
| $\omega$ B97X-D/6-311+G(2d,2p)    | 1860.7        | 18.9  | 939.9        | 7.8   | 626.9        | 5.3  | 32.0 |
| $\omega$ B97X-D/6-311++G(2d,2p)   | 1860.7        | 18.9  | 939.8        | 7.8   | 626.9        | 5.3  | 32.0 |
| $\omega$ B97X-D/6-311G(df,pd)     | 1860.7        | 18.9  | 939.5        | 7.5   | 626.7        | 5.2  | 31.6 |
| $\omega$ B97X-D/6-311+G(df,pd)    | 1858.7        | 16.9  | 939.4        | 7.4   | 626.5        | 4.9  | 29.2 |
| $\omega$ B97X-D/6-311++G(df,pd)   | 1858.7        | 16.9  | 939.5        | 7.4   | 626.5        | 4.9  | 29.2 |
| $\omega$ B97X-D/6-311G(2df,2pd)   | 1866.0        | 24.3  | 940.8        | 8.8   | 627.9        | 6.3  | 39.4 |
| $\omega$ B97X-D/6-311+G(2df,2pd)  | 1864.3        | 22.5  | 940.7        | 8.6   | 627.6        | 6.1  | 37.2 |
| $\omega$ B97X-D/6-311++G(2df,2pd) | 1864.4        | 22.6  | 940.6        | 8.6   | 627.6        | 6.1  | 37.2 |
| $\omega$ B97X-D/6-311G(3df,3pd)   | 1866.3        | 24.5  | 940.8        | 8.8   | 627.9        | 6.4  | 39.7 |
| $\omega$ B97X-D/6-311+G(3df,3pd)  | 1864.9        | 23.1  | 941.0        | 8.9   | 627.8        | 6.3  | 38.3 |
| $\omega$ B97X-D/6-311++G(3df,3pd) | 1864.9        | 23.2  | 940.9        | 8.9   | 627.8        | 6.3  | 38.3 |
| $\omega$ B97X-D/cc-pVDZ           | 1853.1        | 11.4  | 933.2        | 1.2   | 623.1        | 1.5  | 14.0 |
| $\omega$ B97X-D/aug-cc-pVDZ       | 1849.8        | 8.0   | 933.1        | 1.1   | 622.7        | 1.1  | 10.2 |
| $\omega$ B97X-D/cc-pVTZ           | 1864.8        | 23.0  | 940.7        | 8.6   | 627.7        | 6.1  | 37.8 |
| $\omega$ B97X-D/aug-cc-pVTZ       | 1865.5        | 23.7  | 940.4        | 8.3   | 627.6        | 6.1  | 38.1 |
|                                   |               |       |              |       |              |      |      |
| MP2/6-31G(d,p)                    | 1826.4        | -15.4 | 931.4        | -0.7  | 619.2        | -2.4 | 18.4 |
| MP2/6-31+G(d,p)                   | 1819.1        | -22.7 | 929.9        | -2.1  | 617.8        | -3.8 | 28.6 |
| MP2/6-31++G(d,p)                  | 1818.8        | -23.0 | 930.0        | -2.0  | 617.8        | -3.8 | 28.8 |
| MP2/6-311G(d,p)                   | 1830.9        | -10.9 | 929.2        | -2.8  | 618.8        | -2.8 | 16.5 |
| MP2/6-311+G(d,p)                  | 1827.9        | -13.9 | 927.8        | -4.3  | 619.3        | -2.3 | 20.5 |
| MP2/6-311++G(d,p)                 | 1827.8        | -14.0 | 928.0        | -4.0  | 619.0        | -2.6 | 20.6 |
| MP2/6-311G(2d,2p)                 | 1837.4        | -4.4  | 934.0        | 2.0   | 621.6        | 0.0  | 6.4  |
| MP2/6-311+G(2d,2p)                | 1834.8        | -6.9  | 933.5        | 1.5   | 621.1        | -0.5 | 8.9  |
| MP2/6-311++G(2d,2p)               | 1834.8        | -7.0  | 933.5        | 1.4   | 621.1        | -0.5 | 8.9  |
| MP2/6-311G(df,pd)                 | 1853.6        | 11.8  | 934.5        | 2.4   | 623.7        | 2.1  | 16.4 |
| MP2/6-311+G(df,pd)                | 1850.5        | 8.7   | 933.0        | 0.9   | 624.1        | 2.5  | 12.1 |
| MP2/6-311++G(df,pd)               | 1850.5        | 8.7   | 933.1        | 1.0   | 623.8        | 2.3  | 12.0 |
| MP2/6-311G(2df,2pd)               | 1852.5        | 10.7  | 938.7        | 6.6   | 625.4        | 3.9  | 21.2 |
| MP2/6-311+G(2df,2pd)              | 1849.7        | 7.9   | 937.8        | 5.7   | 624.7        | 3.1  | 16.7 |
| MP2/6-311++G(2df,2pd)             | 1849.7        | 7.9   | 937.8        | 5.7   | 624.7        | 3.1  | 16.7 |
| MP2/6-311G(3df,3pd)               | 1849.6        | 7.8   | 937.1        | 5.0   | 624.4        | 2.8  | 15.6 |
| MP2/6-311+G(3df,3pd)              | 1847.3        | 5.6   | 936.9        | 4.8   | 624.0        | 2.4  | 12.8 |
| MP2/6-311++G(3df,3pd)             | 1847.3        | 5.6   | 936.9        | 4.8   | 624.0        | 2.4  | 12.8 |
| MP2/cc-pVDZ                       | 1821.4        | -20.3 | 922.3        | -9.8  | 614.6        | -6.9 | 37.0 |
| MP2/aug-cc-pVDZ                   | 1814.1        | -27.7 | 920.8        | -11.3 | 613.1        | -8.4 | 47.4 |
| MP2/cc-pVTZ                       | 1847.9        | 6.2   | 936.3        | 4.2   | 623.8        | 2.3  | 12.7 |
| MP2/aug-cc-pVTZ                   | 1844.0        | 2.2   | 936.4        | 4.3   | 623.4        | 1.8  | 8.3  |
| <b>Experimental</b>               | <b>1841.8</b> |       | <b>932.1</b> |       | <b>621.6</b> |      |      |
